# Supplementary material for: Human iPSC-derived mature microglia retain their identity and functionally integrate in the chimeric mouse brain
Source: PubMed Central journal article supplement (PMC7101330; doi:10.1038/s41467-020-15411-9), 2020-03-27
Supplement: 41467_2020_15411_MOESM1_ESM.pdf [file 41467_2020_15411_MOESM1_ESM.pdf]

1  
2  
3  
4  
5  
6  
7

**Supplementary Information**

**Human iPSC-derived mature microglia retain their identity and functionally integrate in the chimeric mouse brain**

Xu et al.

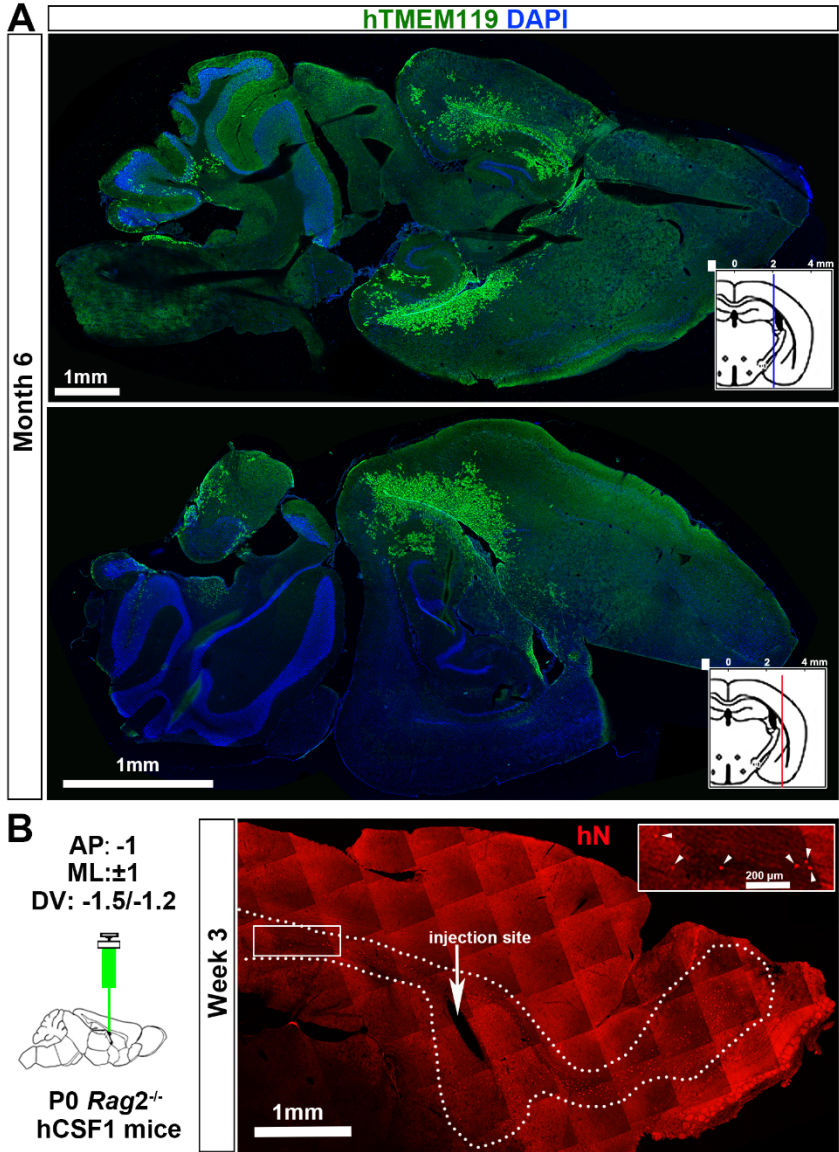

1 **Supplementary Figure 1. Distribution of hPSC-derived microglia in the mouse brain.**  
2 (A) Representative images from sagittal brain sections showing the distribution of xenografted hPSC-  
3 derived microglia at six months post-transplantation. Anti-human-specific TMEM119 (hTMEM119)  
4 staining selectively labels xenografted hPSC-derived microglia. Scale bar: 1 mm.  
5 (B) A schematic diagram and representative images from a sagittal brain section showing the  
6 distribution of xenografted hPSC-derived microglia at three weeks post-transplantation. Human PSC-  
7 derived PMPs were transplanted into the lateral ventricles. Anti-human nuclei (hN) staining selectively  
8 labels xenografted hPSC-derived donor cells. Arrow indicates the injection site. Arrowheads indicate  
9 hN<sup>+</sup> cells. Scale bar: 1 mm or 200 μm in the original or enlarged images, respectively.  
10

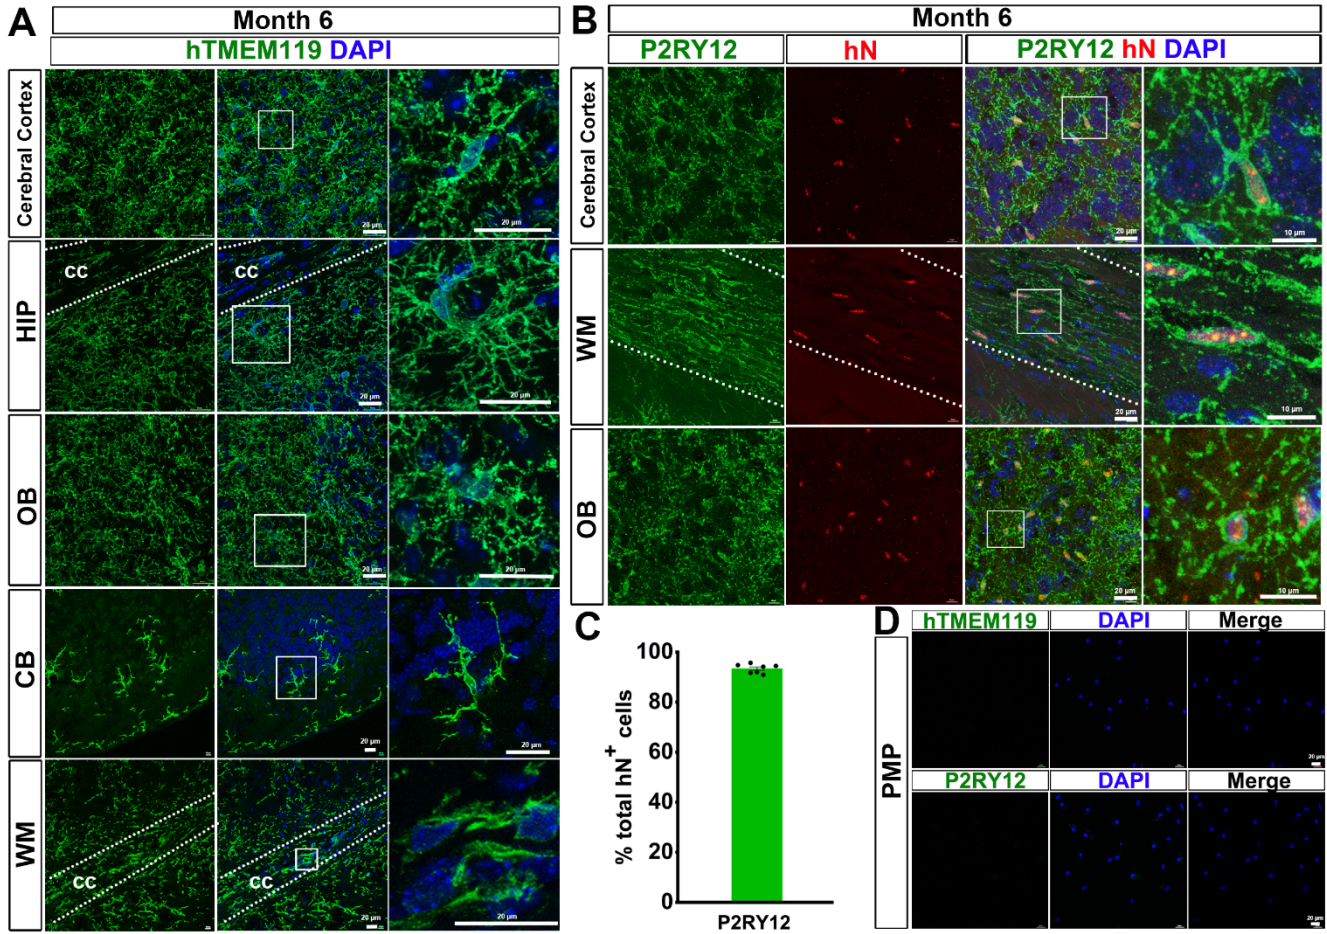



1 **Supplementary Figure 2. Identification of hPSC-derived microglia in the mouse brain.**  
2 (A) Representative images showing the morphology of hTMEM119<sup>+</sup> hPSC-derived microglia in the  
3 cerebral cortex, hippocampus (HIP), olfactory bulb (OB), cerebellum (CB) and white matter (WM) at 6  
4 months post-transplantation. CC: corpus callosum. Scale bars: 50  $\mu$ m or 20  $\mu$ m in the original or  
5 enlarged images, respectively.  
6 (B) Representative images of P2RY12- and hN-expressing cells in the cerebral cortex, WM and OB at 6  
7 months post-transplantation. Scale bars, 20  $\mu$ m or 10  $\mu$ m in the original or enlarged images,  
8 respectively.  
9 (C) Quantification of the percentage of P2RY12<sup>+</sup> cells in total hN<sup>+</sup> cells (n = 7 mice). The data are  
10 pooled from the mice that received transplantation of microglia derived from both hESCs and hiPSCs.  
11 Data are presented as mean  $\pm$  s.e.m.  
12 (D) Representative images showing no expression of hTMEM119 and P2RY12 in the hPSC-derived  
13 PMPs. Scale bars, 20  $\mu$ m.  
14

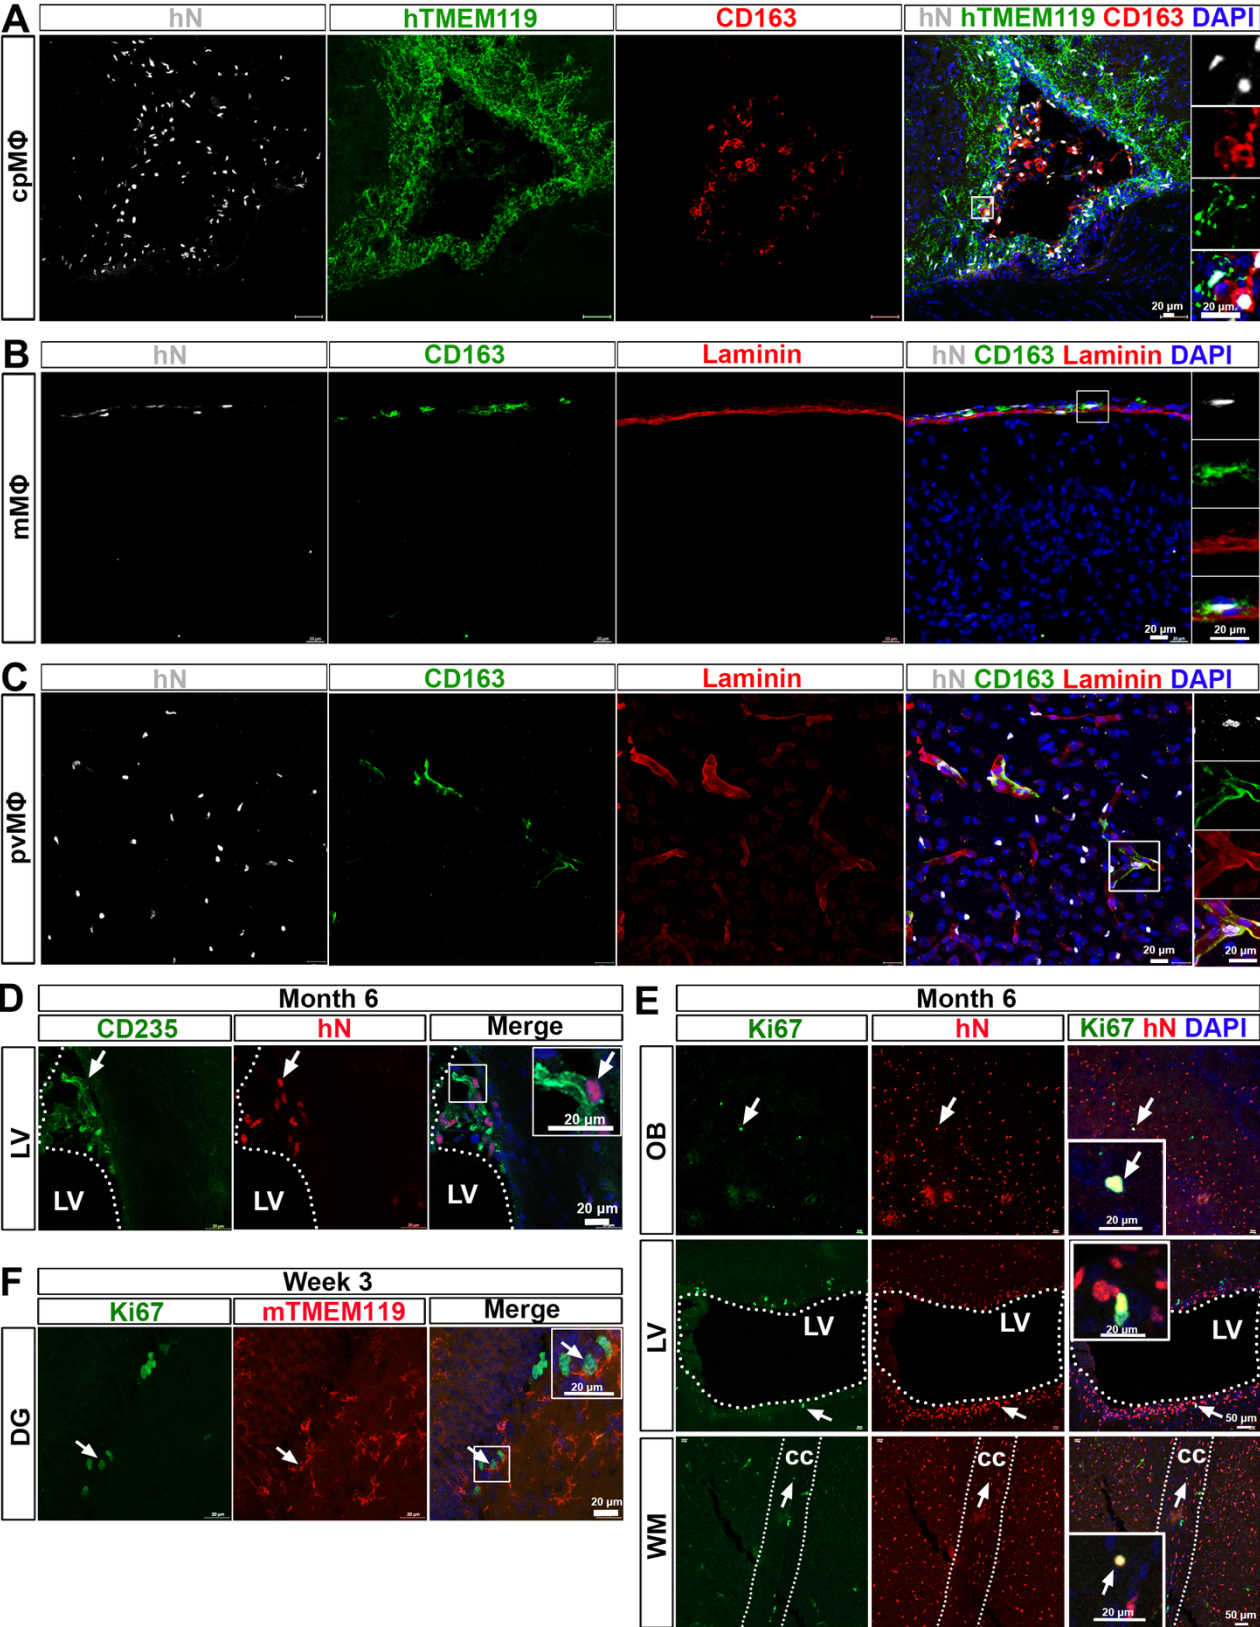

1 **Supplementary Figure 3. Characterization of donor-derived CNS macrophages in the mouse**  
2 **brain.**  
3 (A) Representative images of hTMEM119<sup>-</sup>/hN<sup>+</sup>/CD163<sup>+</sup> choroid plexus macrophage (cpMΦ) in  
4 choroid plexus at 6 months post-transplantation. Scale bars, 20 μm in the original or enlarged images.  
5 (B) Representative images of hN<sup>+</sup> and CD163<sup>+</sup> meningeal macrophage (mMΦ) around the laminin<sup>+</sup>  
6 meninges at 6 months post-transplantation. Scale bars, 20 μm in the original or enlarged images.  
7 (C) Representative images of hN<sup>+</sup> and CD163<sup>+</sup> perivascular macrophages (pvMΦ) in perivascular  
8 spaces at 6 months post-transplantation. Scale bars, 20 μm in the original or enlarged images.  
9 (D) Representative images of CD235<sup>-</sup> and hN-expressing cells in the lateral walls of lateral ventricle  
10 (LV) at 6 months post-transplantation. Scale bars, 20 μm in the original or enlarged images.  
11 (E) Representative images of Ki67- and hN-expressing cells in the olfactory bulb (OB), lateral walls of  
12 LV, and white matter (WM) at 6 months post-transplantation. cc, corpus callosum. Scale bars, 50 μm or  
13 20 μm in the original or enlarged images, respectively.  
14 (F) Representative images of Ki67- and mTMEM119-expressing cells in the dentate gyrus (DG) at 3  
15 weeks chimeric mice. Scale bars, 20 μm in the original or enlarged images.  
16

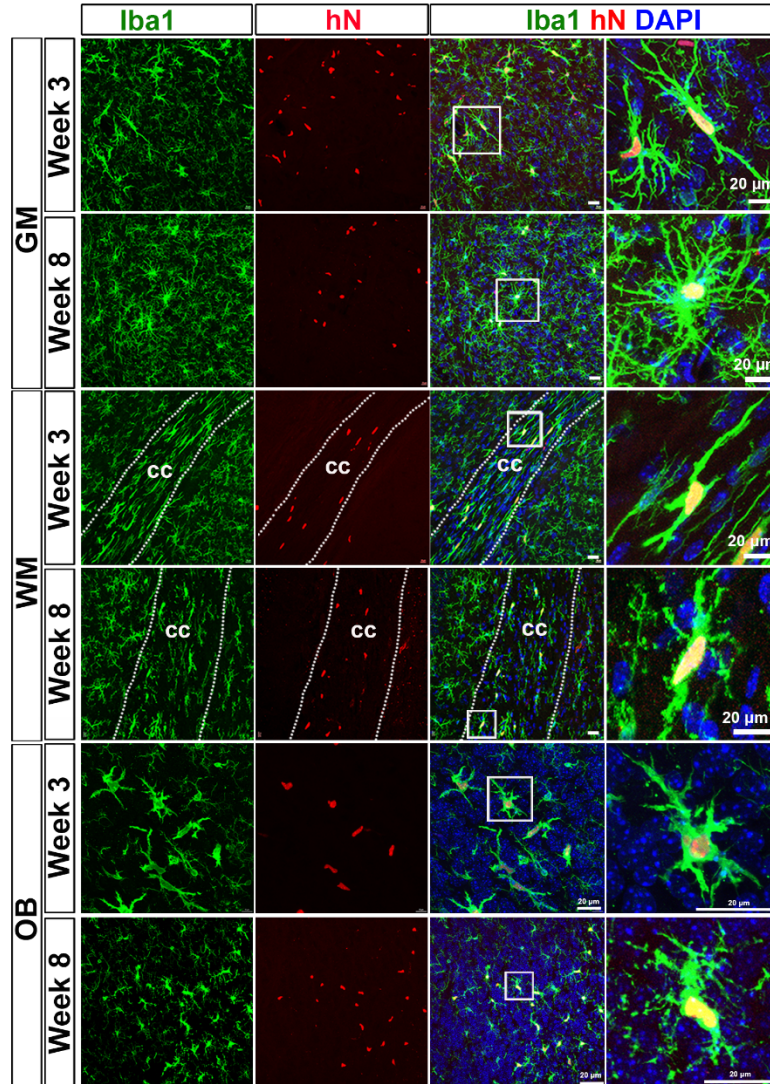

1 **Supplementary Figure 4. Characterization of Human PSC-derived microglia in the mouse brain.**  
2 Representative images of Iba1<sup>+</sup>/hN<sup>+</sup> hPSC-derived microglia in the grey matter (GM), white matter  
3 (WM) and olfactory bulb (OB) at 3 weeks and 8 weeks post-transplantation. cc: corpus callosum. Scale  
4 bars, 20 μm in both the original and enlarged images.  
5

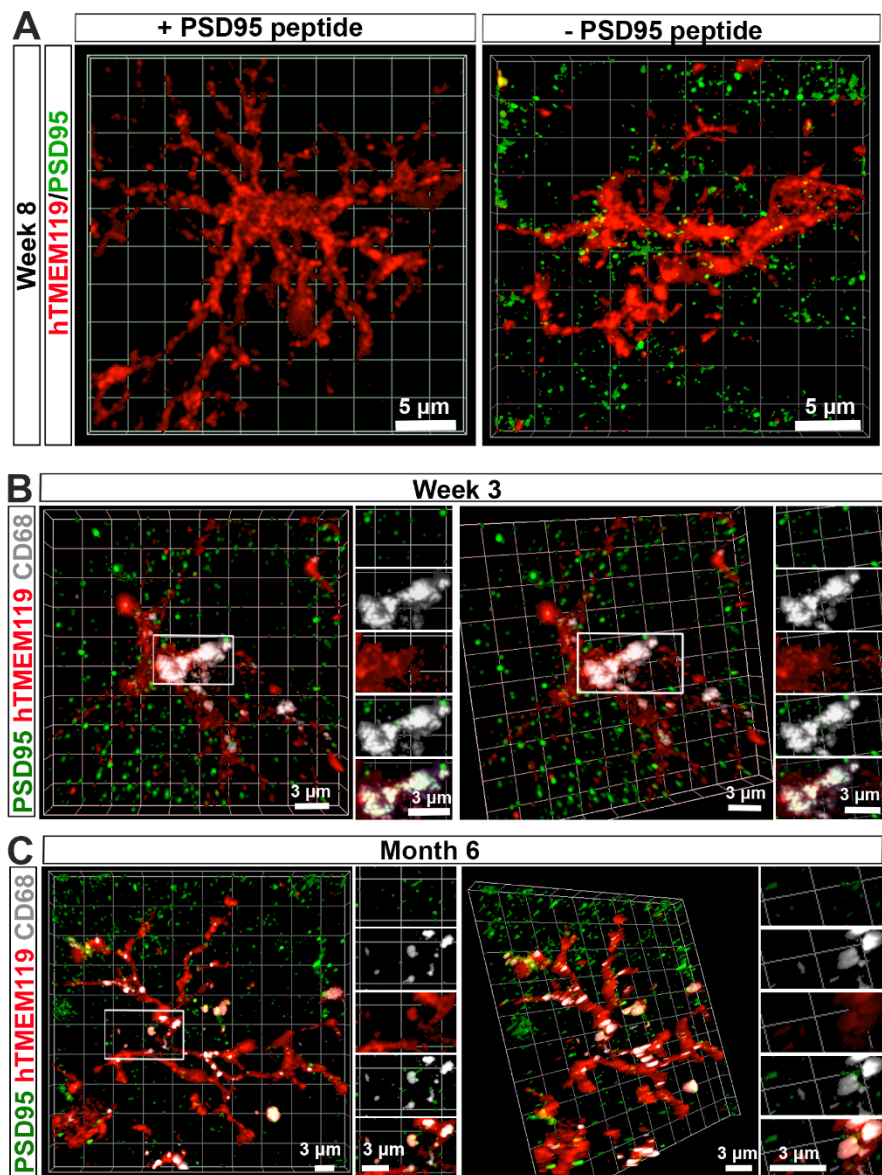



1 **Supplementary Figure 5. Characterization of synaptic pruning by hPSC-derived microglia in the**  
2 **chimeric mouse brain.**

3 (A) Representative images showing PSD95 staining after incubation with PSD95 peptide (left) or  
4 without PSD95 peptide (right). Scale bars, 5 $\mu$ m.

5 (B and C) Representative 3D reconstruction of super-resolution images showing the colocalization of  
6 hTMEM119, PSD95, and CD68 staining in grey matter at 3 weeks (B) and 6 months (C) post-  
7 transplantation. Scale bars, 3  $\mu$ m in the original and enlarged images.  
8

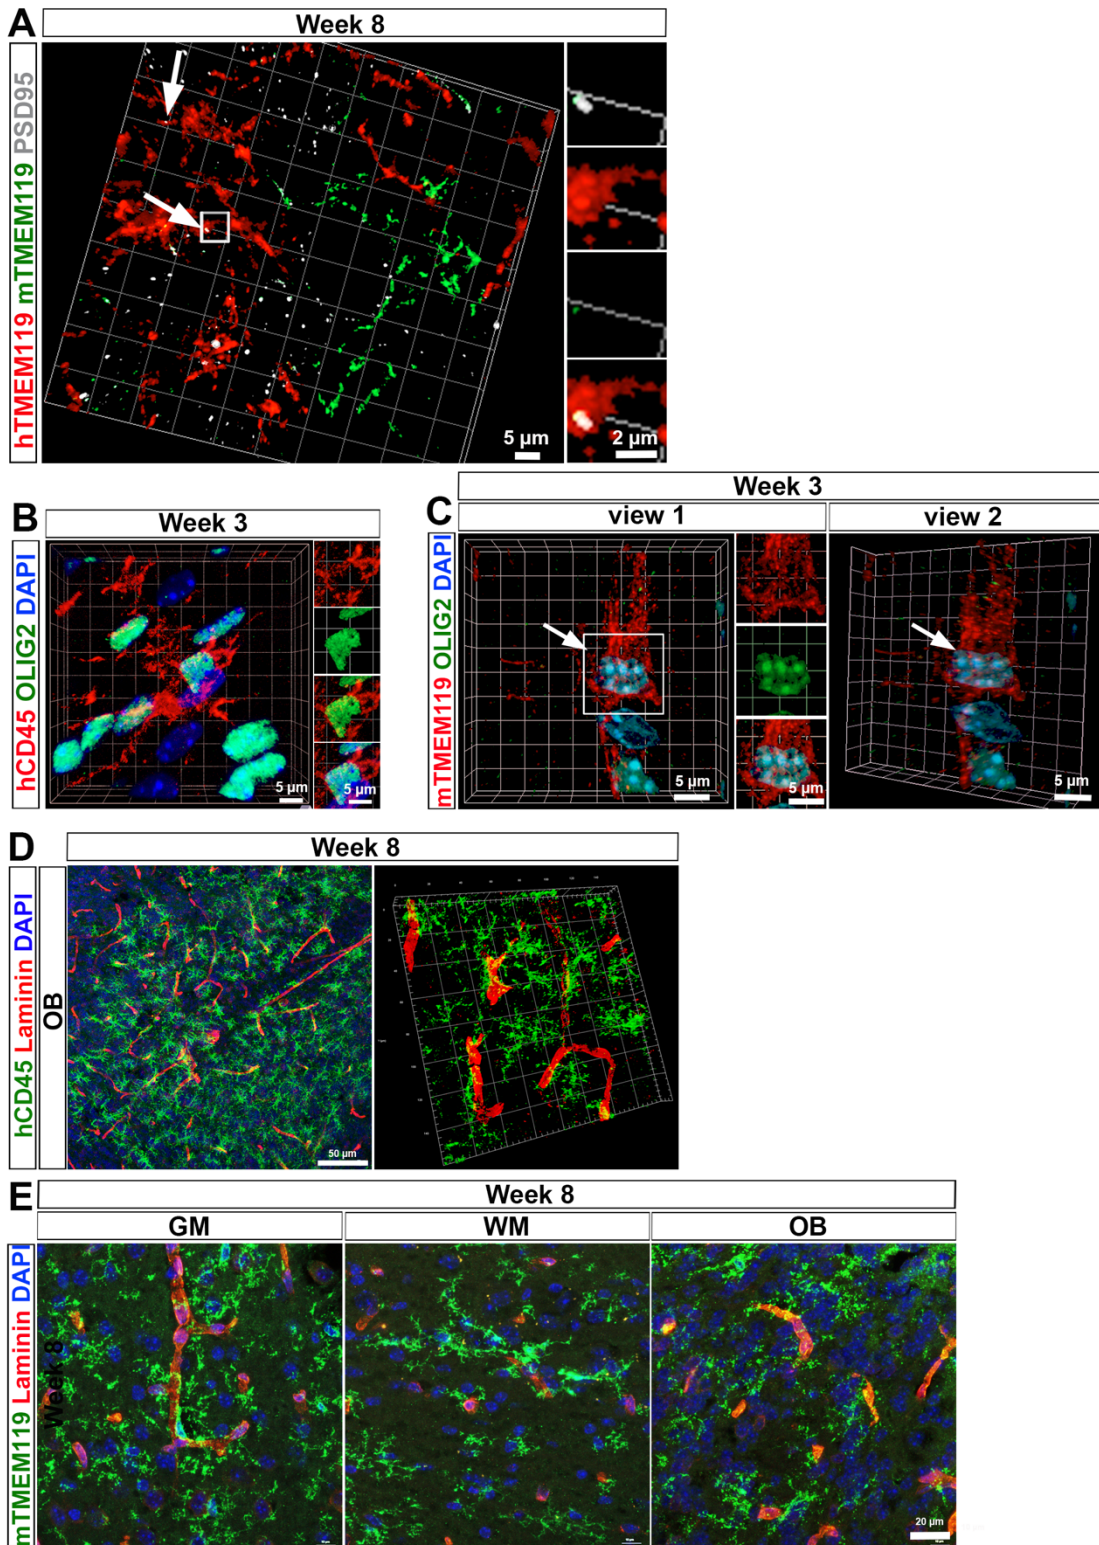

1 **Supplementary Figure 6. Functional comparison between human PSC-derived microglia and**  
2 **mouse host microglia in the chimeric mouse brain.**

3 (A) Representative 3D reconstruction images showing hTMEM119<sup>+</sup> donor-derived microglia engulf  
4 PSD95<sup>+</sup> puncta in grey matter at 8 weeks post-transplantation. Very few mTMEM119<sup>+</sup> mouse host  
5 microglia interact with PSD95. Scale bars, 5  $\mu$ m or 2  $\mu$ m in the original and enlarged images.

6 (B) Representative 3D reconstruction images showing that hCD45<sup>+</sup> hPSC-derived microglia  
7 phagocytize OLIG2<sup>+</sup> oligodendroglial cells in the corpus callosum at 3 weeks post-transplantation.  
8 Scale bars, 5  $\mu$ m.

9 (C) Representative 3D reconstruction of super-resolution images showing that mTMEM119<sup>+</sup> mouse  
10 host microglia phagocytize OLIG2<sup>+</sup> oligodendroglial cells in the corpus callosum in 3 weeks old chimeric  
11 mice. Scale bars, 5  $\mu$ m.

12 (D) Representative images showing the interaction between laminin<sup>+</sup> blood vessel and hCD4<sup>+</sup> human  
13 microglia in the olfactory bulb (OB) and white matter at 8 weeks post-transplantation. Scale bars, 50  
14  $\mu$ m.

15 (E) Representative images showing interaction between laminin<sup>+</sup> blood vessel and mTMEME119<sup>+</sup>  
16 mouse host microglia in grey matter (GM), white matter (WM) and OB at 8 weeks post-transplantation.  
17 Scale bars, 20  $\mu$ m.

18

**A**

| Sample | Estimated Number of Cells | Mean Reads per Cell | Number of Reads | Valid Barcodes | Reads Mapped to Genome | hg19 Reads Mapped to Genome | mm10 Reads Mapped to Genome | Reads Mapped Confidently to Genome | hg19 Reads Mapped Confidently to Genome | mm10 Reads Mapped Confidently to Genome |
|--------|---------------------------|---------------------|-----------------|----------------|------------------------|-----------------------------|-----------------------------|------------------------------------|-----------------------------------------|-----------------------------------------|
| s1     | 6,390                     | 14,469              | 92,458,639      | 96.80%         | 94.00%                 | 7.20%                       | 86.90%                      | 82.00%                             | 6.70%                                   | 75.30%                                  |
| s2     | 8,811                     | 10,803              | 95,192,063      | 96.70%         | 93.40%                 | 7.40%                       | 86.20%                      | 81.80%                             | 6.90%                                   | 74.90%                                  |
| s3     | 6,742                     | 15,020              | 101,270,517     | 96.50%         | 93.70%                 | 14.40%                      | 79.50%                      | 87.30%                             | 13.60%                                  | 73.80%                                  |
| s4     | 8,031                     | 12,957              | 104,060,861     | 96.60%         | 92.20%                 | 4.50%                       | 87.90%                      | 81.80%                             | 4.10%                                   | 77.70%                                  |
| Mean   | 7,494                     | 13,312              | 98,245,520      | 96.65%         | 93.33%                 | 8.38%                       | 85.13%                      | 83.23%                             | 7.83%                                   | 75.43%                                  |

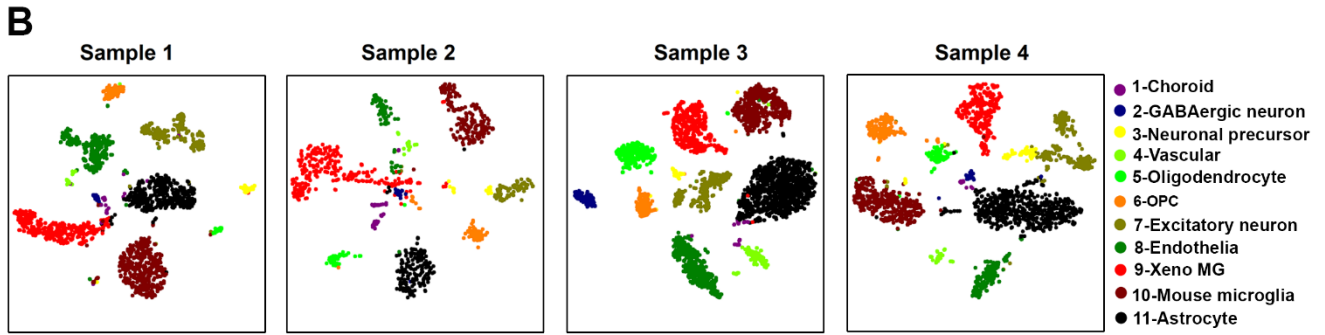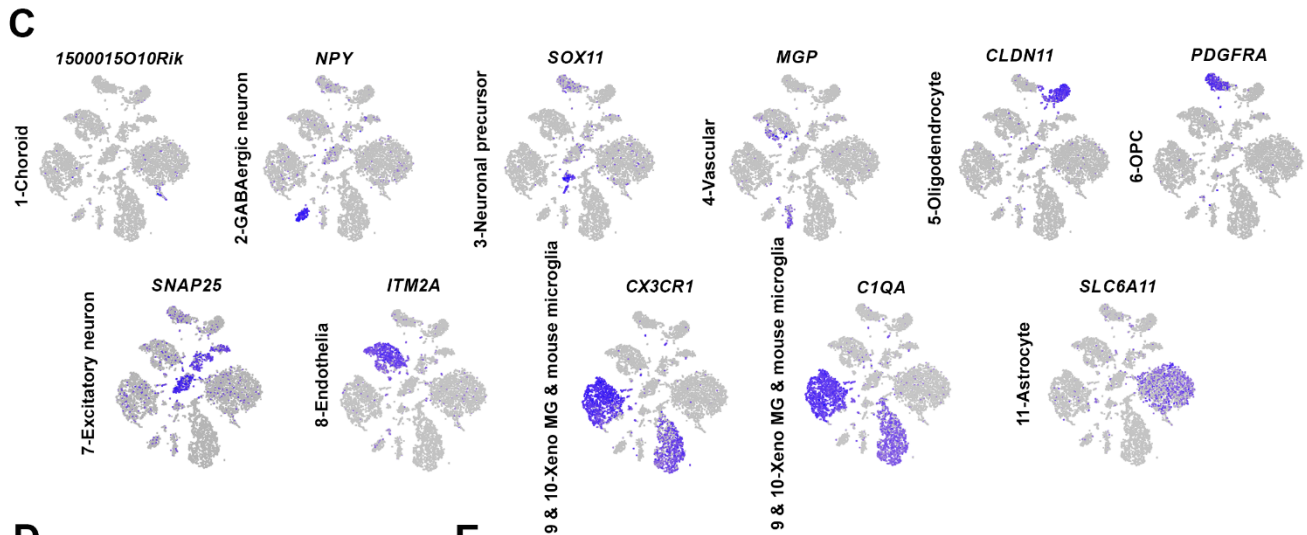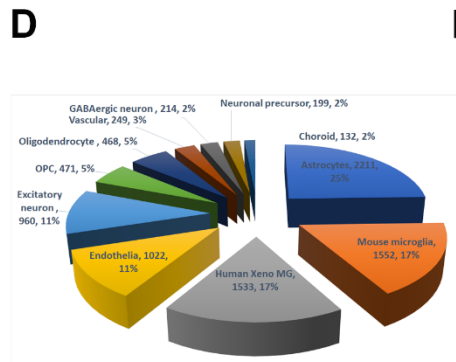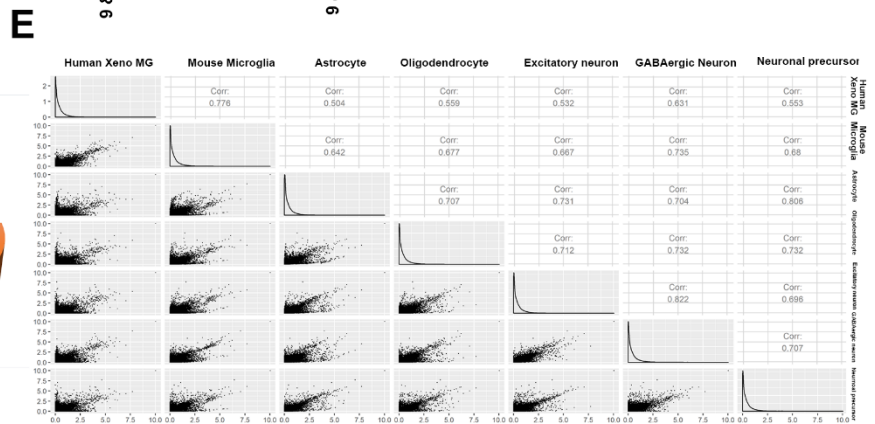

1 **Supplementary Figure 7. Single-cell RNA-sequencing of hiPSC microglial chimeric mouse**  
2 **brains.**  
3 (A) A table summarizing the observed numbers of single-cell RNA-sequencing reads and those  
4 matching human (hg19) or mouse (mm10) genome with high confidence. The numbers (with  
5 percentages in parentheses) of detected mouse/human microglia, respectively, detected in each  
6 dissected sample were: Sample 1: 442/395 (21.6%/19.3%); Sample 2: 176/274 (18.0%/28.1%);  
7 Sample 3: 551/537 (14.6%/14.3%); Sample 4: 383/327 (17.2%/14.7%).  
8 (B) tSNE plots showing that the 11 cell type clusters are individually reproduced in each of the four  
9 sampled 6-month-old chimeric mouse brains. For this analysis, results from each replicate animal were  
10 analyzed and clustered separately.  
11 (C) tSNE plots showing the expression of representative genes in each of the 11 clusters. Blue color  
12 saturation indicates relative log normalized counts in each cell (dot, as identified by unique barcode).  
13 (D) A pie chart summarizing the numbers of cells (barcodes) identified within each clustered cell type.  
14 (E) Scatter plot array showing the pairwise correlation of average expression for each cell type.  
15 Notably, the Xeno MG and mouse microglia clusters had the highest correlation coefficient value,  
16 0.776.

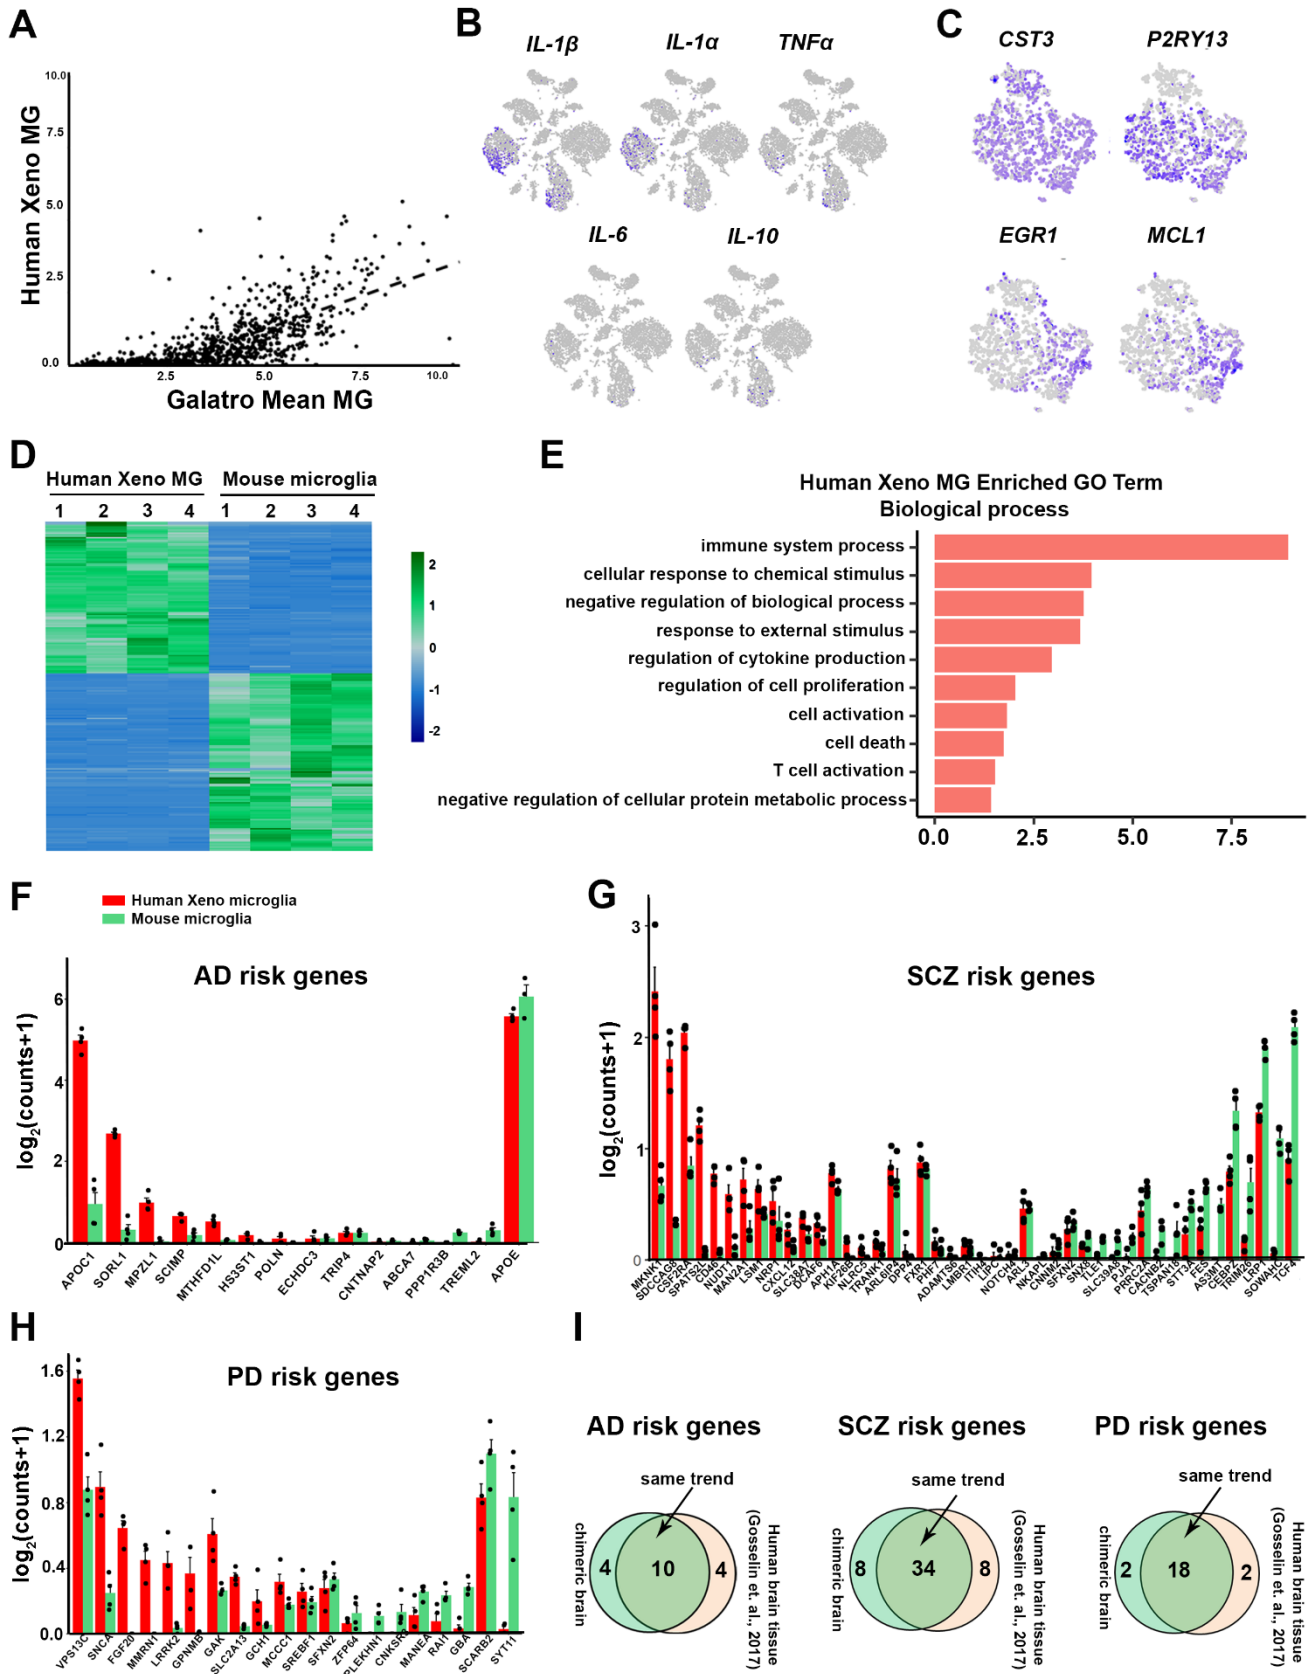



1 **Supplementary Figure 8. Transcriptomic profile of Xeno MG developed in the mouse brain.**  
2 (A) Scatter plot showing correlation of human Xeno MG with human adult microglia dataset reported in  
3 Galatro et. al., 2017. Expression levels are normalized reads per million (RPM). The 10X Genomics  
4 data from the Human Xeno MG matched only the relatively higher levels of expression ( $\log_2$  RPM > 2)  
5 of the deeper (more RNAseq reads per sample) dataset from Galatro. However, transcripts above this  
6 threshold exhibited a strong correlation ( $r^2 = 0.3851$ ,  $p < 2.2 \times 10^{-16}$ , ANOVA comparing linear model of  
7 regression with a null model).  
8 (B) t-SNE plots for mRNA expression of acute pro-inflammatory cytokines, *IL-1 $\beta$* , *IL-1 $\alpha$* , and *TNF- $\alpha$* , and  
9 chronic pro-inflammatory cytokine, *IL-6* and anti-inflammatory cytokine, *IL-10*.  
10 (C) t-SNE plots for *CST3*, *P2RY13*, *EGR1*, and *MCL1* mRNA expression (log normalized counts) within  
11 the selected human Xeno MG cluster.  
12 (D) A heatmap showing the DEGs in individual samples (n = 4 mice) of human and mouse microglia  
13 from 6-month old chimeric mouse brains. Expression levels (log normalized counts) were normalized  
14 to mean expression of all samples, producing a Z-score, with color assignments indicated by the  
15 legend.  
16 (E) Enriched gene ontology (GO) biological process terms for the upregulated DEGs in human Xeno  
17 MG, plotted as the  $-\log_{10}$  (p-value) of enrichment.  
18 (F-H) Bar plots showing the expression (mean  $\pm$  SEM, n = 4 mice) of Alzheimer's disease (AD),  
19 schizophrenia (SCZ), or Parkinson's disease (PD)-associated genes in Xeno MG and mouse microglia.  
20 All these genes were reported to be differentially expressed between human and mouse microglia in  
21 Gosselin et al., 2017.  
22 (I) Venn diagram showing that the majority of genes that were reported to be differentially expressed  
23 between human and mouse microglia are recapitulated in our chimeric mouse model (10 of 14 for AD,  
24 34 of 42 for SCZ, and 18 of 20 for PD).

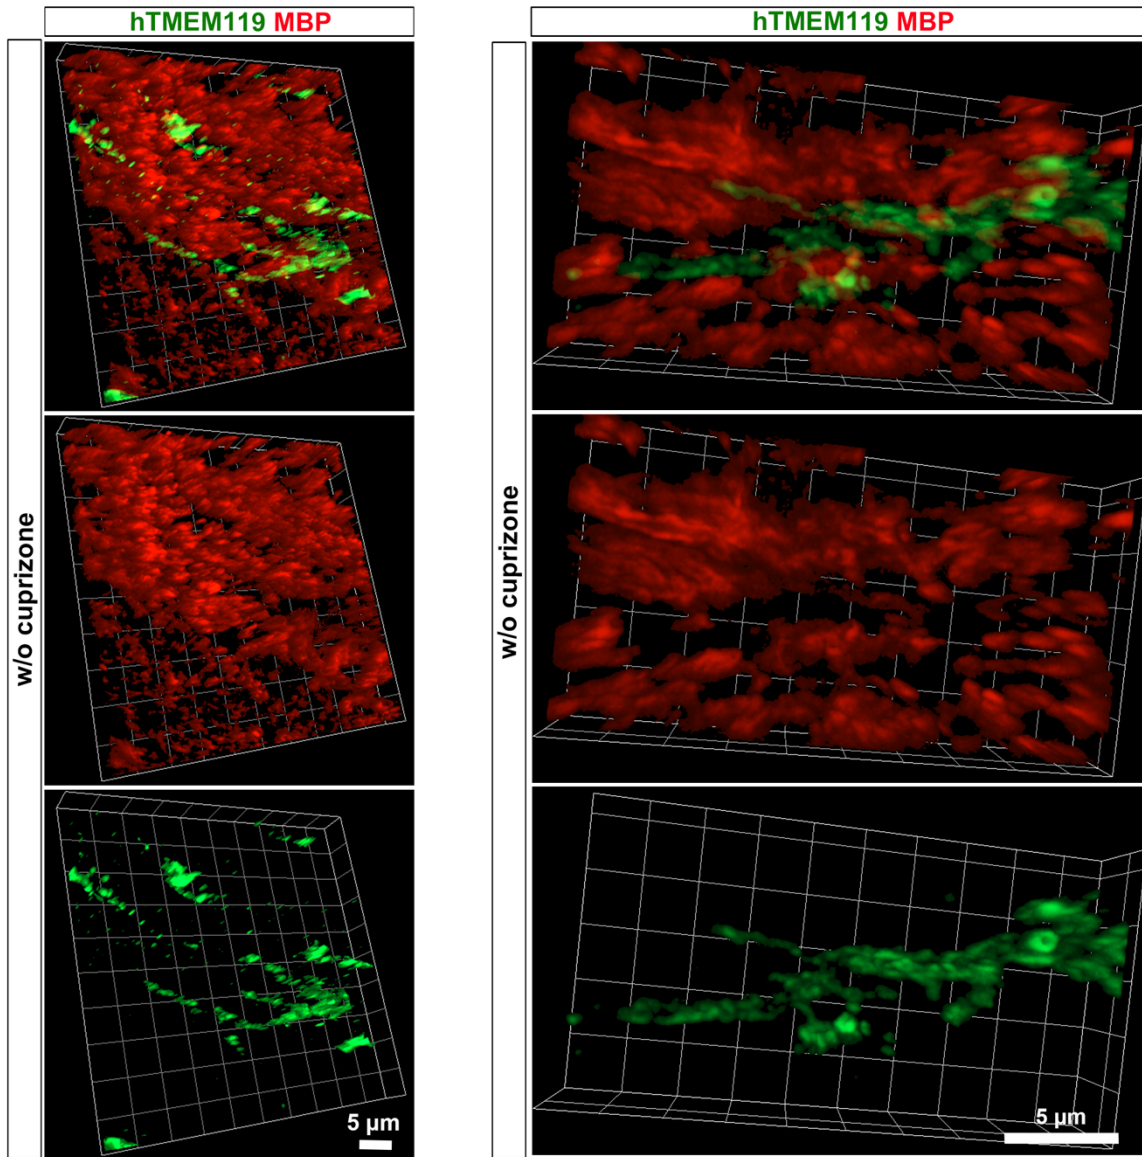

1 **Supplementary Figure 9.** Representative 3D reconstruction of super-resolution images showing  
 2 hTMEM119<sup>+</sup> donor-derived microglia and MBP<sup>+</sup> myelin structure in the corpus callosum at after 4  
 3 weeks of control diet without cuprizone. Scale bars, 5  $\mu$ m.  
 4  
 5

6 **Supplementary Data 1. The top 10 enriched genes in each cluster.** For each cell type cluster  
 7 identified by Seurat analysis, the top ten genes distinguishing that cluster from all other cells are shown,  
 8 as calculated by the FindAllMarkers function. The p-values (p\_val) were calculated using a Wilcoxon  
 9 Rank Sum test, two-tailed, and were adjusted for multiple measurements using Benjamini-Hochberg  
 10 (p\_val\_adj).  
 11

12 **Supplementary Data 2. A list of differentially expressed genes between Xeno MG and mouse**  
 13 **microglia.** Gene expression differences between human and mouse microglial clusters were calculated  
 14 by the Seurat FindMarkers function. The p-values (p\_val) were calculated using a Wilcoxon Rank Sum  
 15 test, two-tailed, and were adjusted for multiple measurements using Benjamini-Hochberg (p\_val\_adj).  
 16

17 **Supplementary Table 1. A list of antibodies used.**

| Antibodies        | Vendor/Catalog #.                     | Type       | Dilution |
|-------------------|---------------------------------------|------------|----------|
| CD163             | R&D system / AF1067                   | Goat IgG   | 1:200    |
| CD235             | Thermo Fisher Scientific / PA5-27154  | Rabbit IgG | 1:100    |
| CD43              | Thermo Fisher Scientific / 14-0439-82 | Mouse IgG1 | 1:25     |
| CD45              | Thermo Fisher Scientific / 14-9457-82 | Mouse IgG1 | 1:40     |
| CD68              | Invitrogen / MA5-13324                | Mouse IgG1 | 1:100    |
| CD74              | Invitrogen / JF40-10                  | Rabbit IgG | 1:200    |
| hTMEM119          | Thermo Fisher Scientific / PA-62505   | Rabbit IgG | 1:400    |
| mTMEM119          | Synaptic Systems/400011               | Mouse IgG  | 1:100    |
| Human nuclei (hN) | Millipore / MAB4383                   | Mouse IgG1 | 1:100    |
| Iba1              | Wako/ 019-19741                       | Rabbit IgG | 1:100    |
| laminin           | Sigma/ L9393                          | Rabbit IgG | 1:30     |
| MBP               | Millipore / MAB386                    | Rat IgG    | 1:100    |
| Ki67              | Cell signaling / 9449                 | Mouse IgG  | 1:400    |
| Ki67              | Thermo Fisher Scientific / SP6        | Rabbit IgG | 1:200    |
| OLIG2             | Phosphosolutions 1538                 | Rabbit IgG | 1:500    |
| PDGFR $\alpha$    | Santacruz / sc-398206                 | Mouse IgG  | 1:200    |
| PU.1              | Thermo Fisher Scientific / phpu13     | Mouse IgG1 | 1:50     |
| P2RY12            | Invitrogen / PA5-77671                | Rabbit IgG | 1:100    |
| PSD95             | Invitrogen 51-6900                    | Rabbit IgG | 1:100    |
| PSD95             | Abcam / ab12093                       | Goat IgG   | 1:400    |
| SPP1              | Proteintech / 22952-1-AP              | Rabbit IgG | 1:200    |
| Synapsin I        | Millipore / AB1543P                   | Rabbit IgG | 1:400    |

18
